# Supplementary material
Source: HighWire-hosted journal article supplement (https://www.annfammed.org/content/suppl/2011/07/07/9.4.351)
Supplement: DeVoe_Supp_App.pdf [file DeVoe_Supp_App.pdf]

## Online Supplementary Material

DeVoe JE, Gold R, McIntire P, Puro J, Chauvie S, Gallia CA. Electronic health records vs Medicaid claims: completeness of diabetes preventive care data in community health centers. *Ann Fam Med*. 2011;9(4):351-358.

<http://www.annfammed.org/cgi/content/full/9/4/351>

---

### Supplemental Appendix. Diagnostic and Procedure Codes Used to Identify Diabetes and Associated Care

All codes used to identify service receipt were confirmed with OCHIN data staff. Shortened procedure names were due to field length in the OCHIN data.

Diabetes: ICD-9 codes 250.x, 253.5, 357.2, 362.01-2, 366.41, 790.21-2, 790.29, 791.5-6, V65.46)

Receipt of LDL cholesterol screening: CPT code 80061, 83721, 83718, 83719, 83721, LT590, 82465, LP104, LP396, LP544, or LR597, or procedure name "Finger stick lipid panel," "Lipid panel with reflex," "Lipid panel," "Lipid panel; cholesterol, serum, total lipoprotein," "LDL measured," "LDL cholest, meas-reflex," "Lipoprotein, direct measurement; direct measurement, LDL cho," "Lipoprotein, direct measurement; high density cholesterol (h," "HDL cholesterol," "Lipoprotein, direct measurement; high density chol," "Lipoprotein, direct measurement; direct measuremen," "Rflx - lipid profile," "assay, bld/serum cholesterol," "Cholesterol, serum or whole blood, total," "HCM panel," "VAP TM cholesterol profile," "Lipid panel with direct LDL, serum," or "Rflx - LDL cholesterol, direct."

Influenza vaccination: CPT code 90658, 90660, G0008, 90657, 90656, 90655, TM181, TM179, or TM008, or procedure name "CHDP influenza vaccine, 3+ years, IM," "Influenza virus vaccine, 3+ years, IM use," "Influenza virus vaccine, split virus, 3 years" "Flu vaccine, nasal," "Administration of influenza virus vaccine," "Administration of influenza virus vaccine when no," "Influenza virus vaccine, 6-35 months, IM use," "Influenza virus vaccine, split virus, 6-35 months," "Influenza, split, 3+yrs, preservative free," "Influenza virus vaccine, split virus, preserv free," "Influenza, split, 6-35mo, preservative free," "CHDP influenza," "CHDP flu mist," "Influenza, 6-35mo, preservative free," or "CHDP influenza."

Microalbumin screening: CPT code 82043, 82044, LP305, or LP432, or procedure name "Albumin, urine, microalbumin, quantitative," "Microalbumin, urine random," "Microalbumin-random," "Microalbumin, 24 hour UR," "Albumin,urine," "Albumin; urine, microalbumin, semiquantitative," "Albumin, urine, microalbumin, semiquantitative (eg," "Microalbumin/creatinine, urine," or "Microalbumin random w/creatinine

HbA<sub>1c</sub> screening: CPT code 83036, 83037, or LP316, or procedure name "Glycohemoglobin GHB, total," "Hemoglobin A1c," "Hemoglobin, glycosylated (A1c)," "HGB A1c fingerstick," "Hemoglobin; glycosylated (A1c) by device cleared," or "Hemoglobinopathy evaluation, blood."

---

CPT = Current Procedural Terminology; HbA<sub>1c</sub> = glycated hemoglobin; ICD-9 = International Classification of Disease, Ninth Revision; LDL = low-density lipoprotein.
